# Supplementary material
Source: Springer Nature journal article supplement (https://www.springermedizin.de/resource/supplementary/12889_2014_7326_MOESM4_ESM.pdf/9497252)

### A. Kunene Region

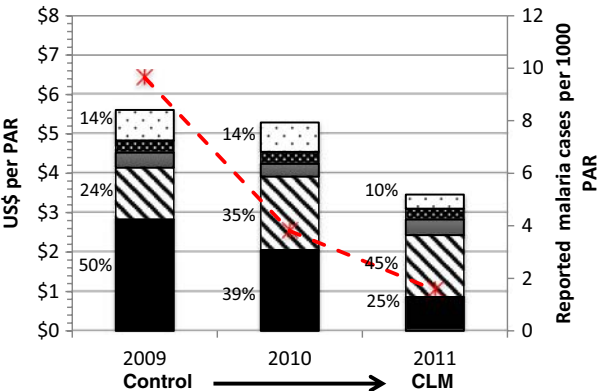

### B. Omusati Region

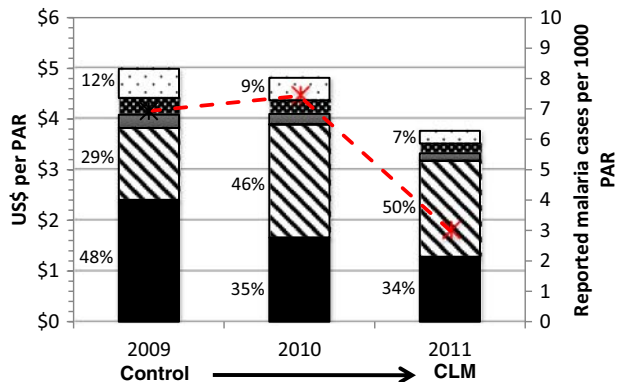

### C. Ohangwena Region

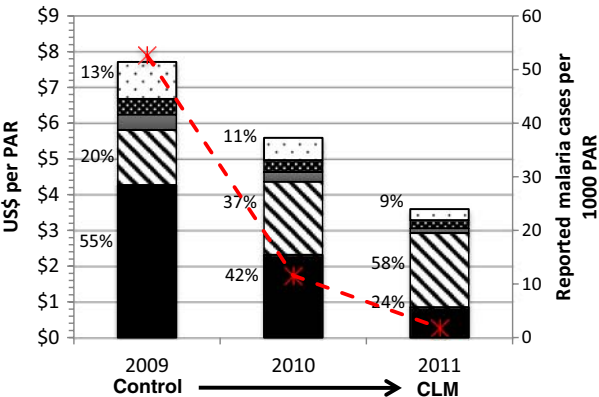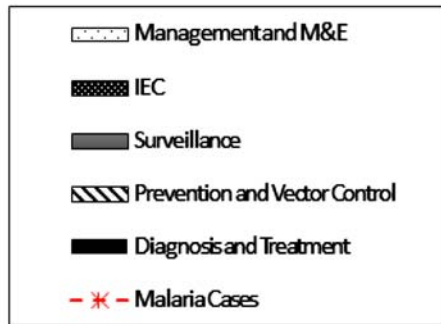

Supplement: MOESM4 [file 9497252]
